# Supplementary material for: Effect of Mailed Human Papillomavirus Test Kits vs Usual Care Reminders on Cervical Cancer Screening Uptake, Precancer Detection, and Treatment: A Randomized Clinical Trial
Source: PubMed Central journal article supplement (PMC6865279; doi:10.1001/jamanetworkopen.2019.14729), 2019-11-06
Supplement: jamanetwopen-2-e1914729-s001.pdf [file jamanetwopen-2-e1914729-s001.pdf]

1 **ClinicalTrials.gov Identifier:** [NCT02005510](https://clinicaltrials.gov/ct2/show/study/NCT02005510)

2  
3 **OFFICIAL TITLE:** Randomized Trial of In-Home Cervical Cancer Screening in  
4 Underscreened Women

5  
6 **SHORT TITLE:** HOME Study

7  
8 **Coordinating Center:** University of Washington

9  
10 **Principal Investigator:** *Rachel L. Winer*  
11 *Department of Epidemiology*  
12 *School of Public Health*  
13 *University of Washington*  
14 *Seattle, Washington, U.S.A.*

15  
16 **Co-Investigator:** *Diana S.M. Buist*  
17 *Kaiser Permanente Washington Health Research Institute*  
18 *Seattle, Washington, U.S.A.*

19  
20 **Study Coordinator:** *Tara Beatty*  
21 *Kaiser Permanente Washington Health Research Institute*  
22 *Seattle, Washington, U.S.A.*

23  
24 **Study Exempt from IDE requirements**

25 On September 12, 2013 (Q130922 Study Determination request) FDA determined  
26 intervention is a nonsignificant risk (NSR) device as does not meet definition of a significant  
27 risk (SR) device under §812.3(m) of the investigational device exemptions (IDE) regulation  
28 (21 CFR 812).

29  
30 **Final Protocol Date:** *March 17, 2015*

31  
32 **Protocol Revision Dates:** *March 17, 2015*

33  
34 **Initial Protocol Date:** *January 7, 2014*

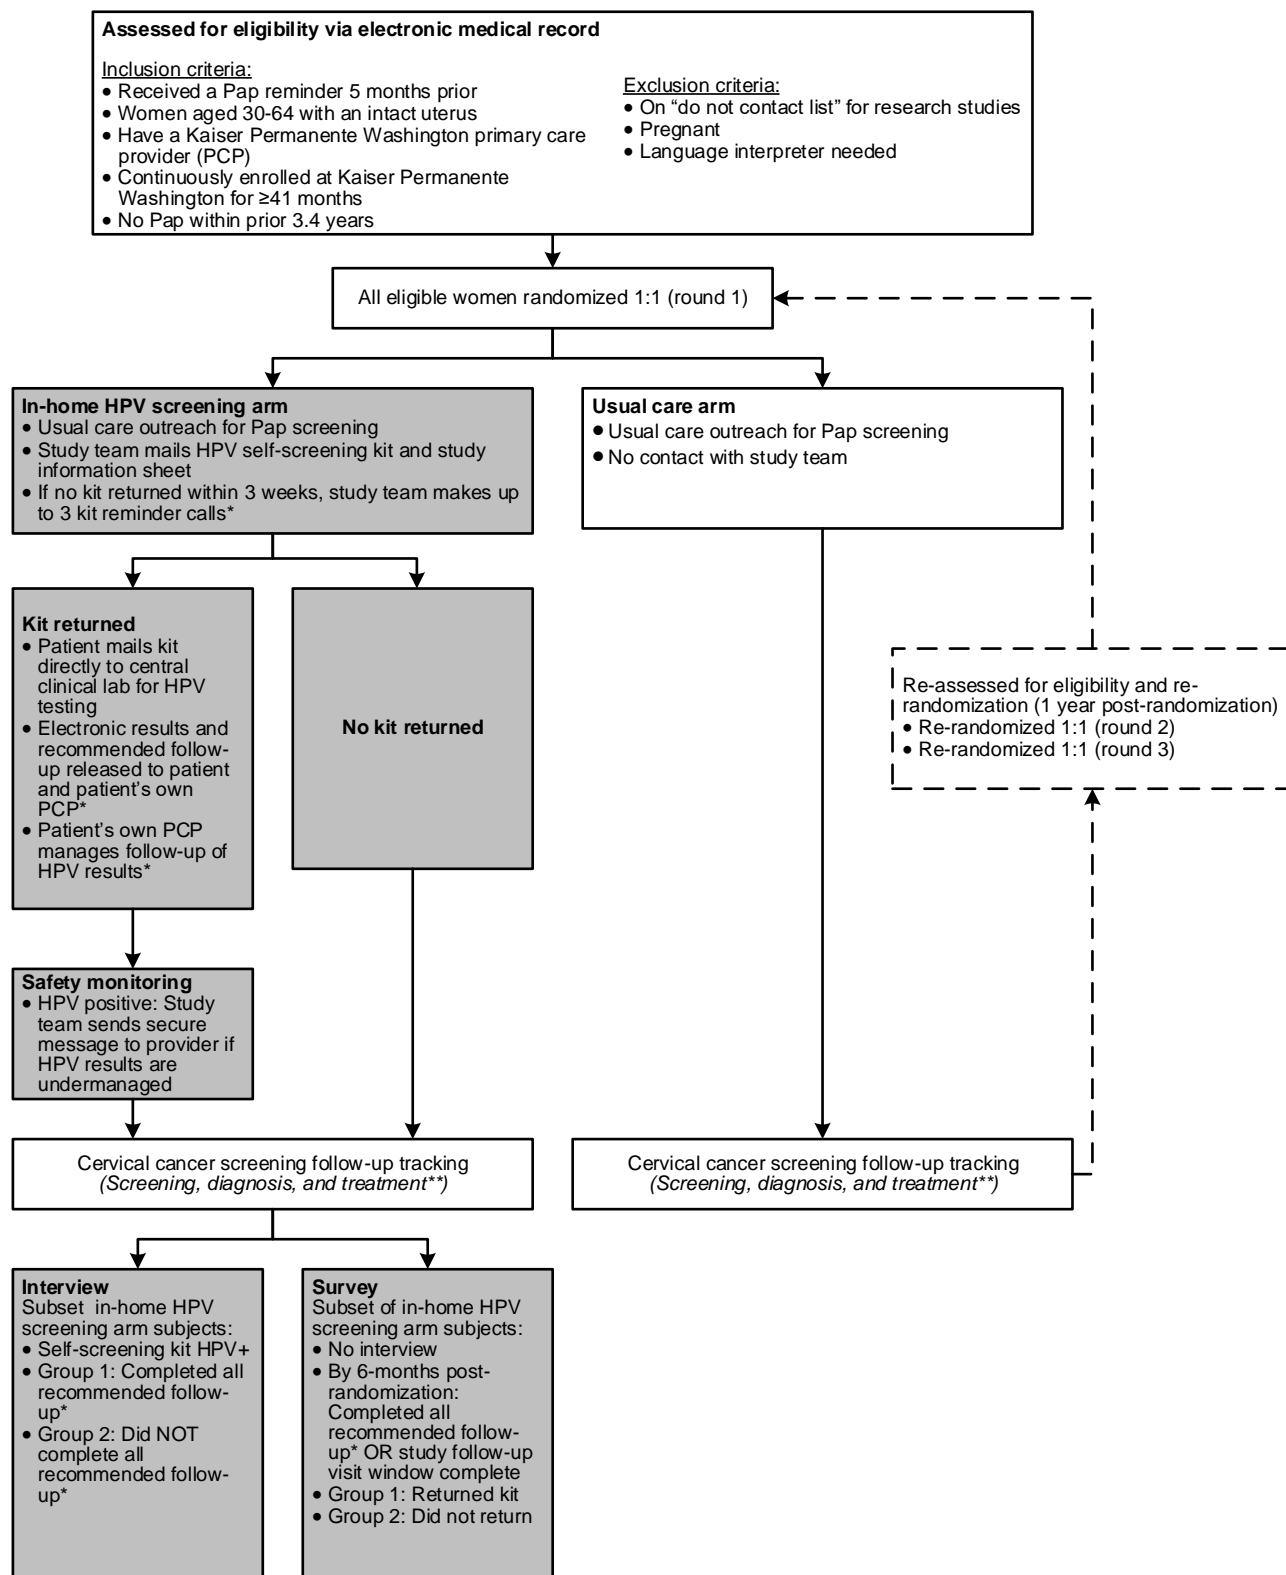

\* Mirrors clinical system outreach or follow-up procedures  
 \*\* See Figure 2 for diagram of cervical cancer screening, diagnosis, and treatment outcome definitions and time windows

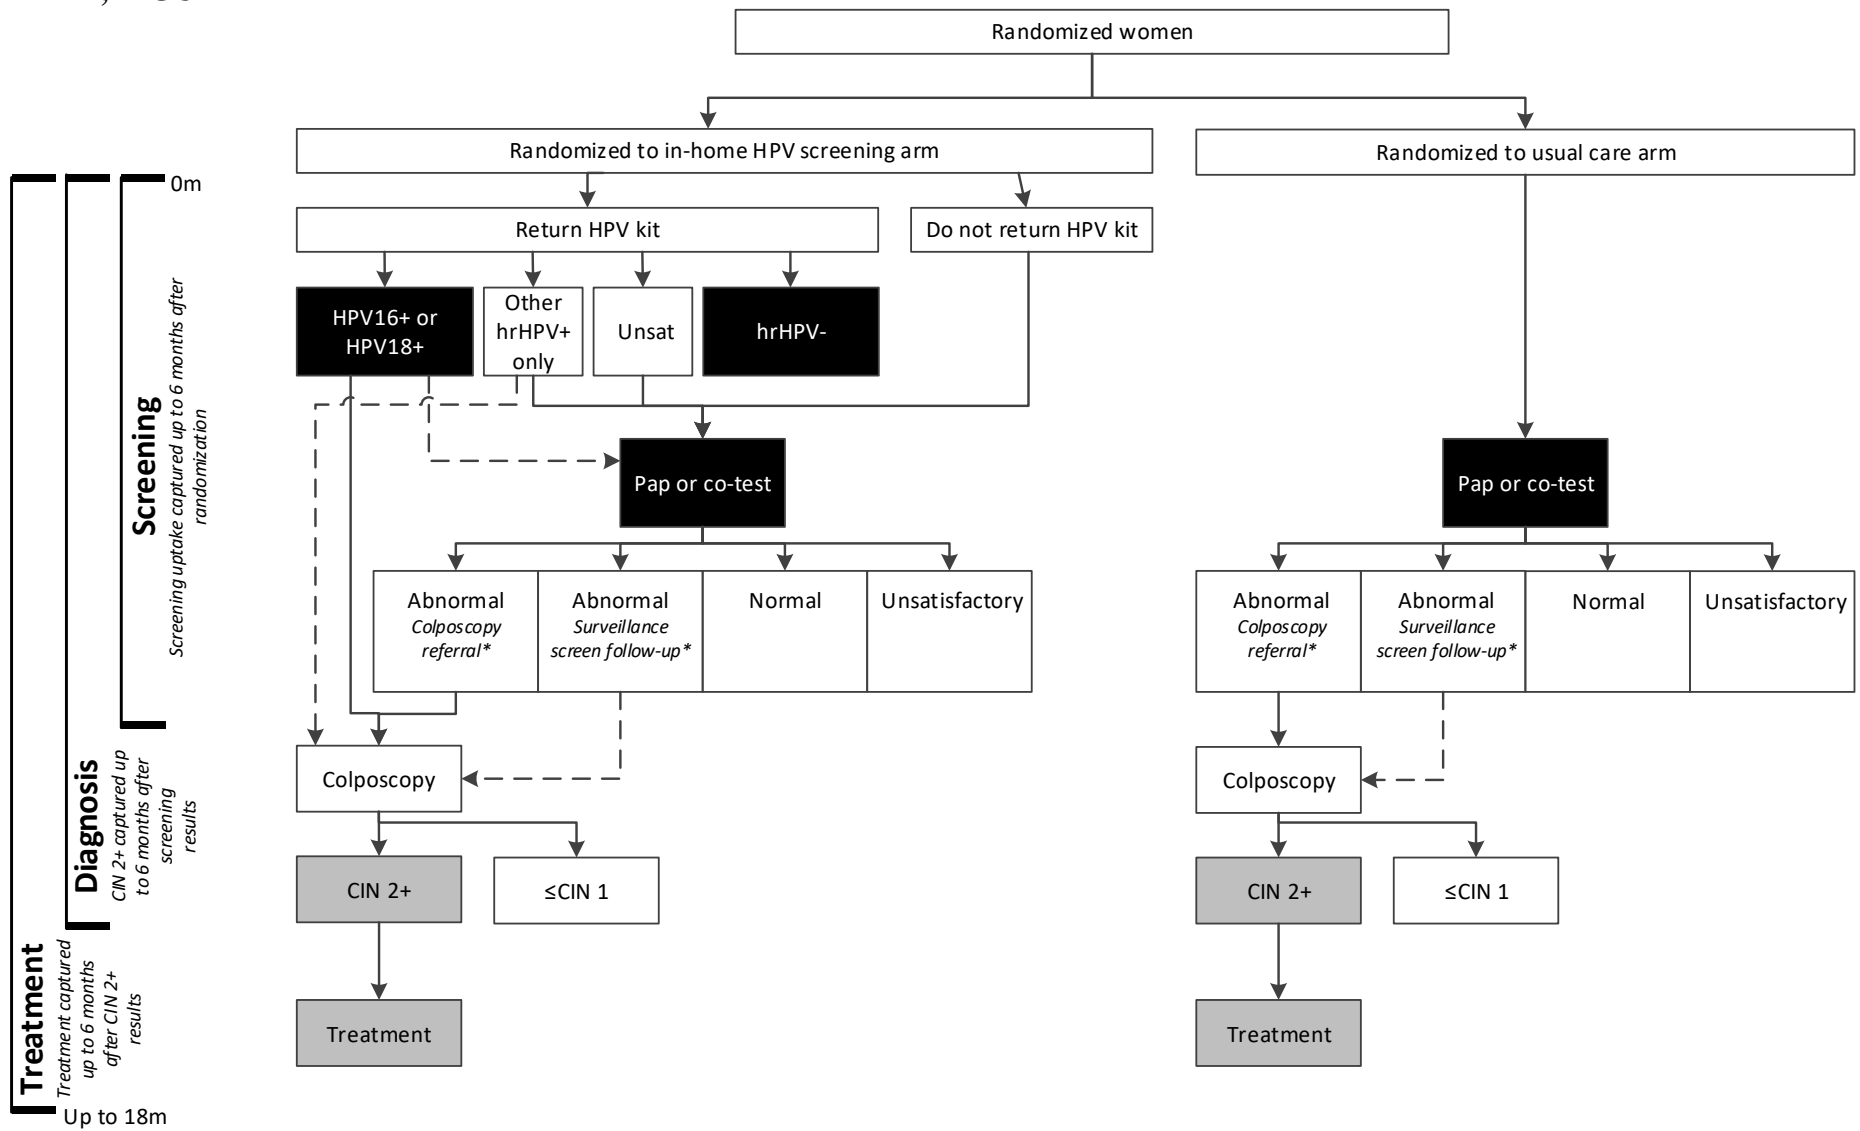

Black boxes represent screening uptake outcomes  
 Grey boxes represent diagnosis and treatment outcomes  
 - - - - -> Dashed lines represent non guideline-recommended management  
 \* Asterisk notes follow-up per current national guidelines (2012 cervical cancer screening [1] and 2013 abnormal result management guidelines [2]), i.e.,  
 - Colposcopy referral: Pap and/or HPV result of  $\geq$ LSIL or ASC-US & HPV+, or HPV 16/18+  
 - Surveillance screen follow-up: Pap and/or HPV result of ASC-US or LSIL & HPV-, or Pap- & HPV+

41  
42

## SUMMARY OF CHANGES – PROTOCOL

| #  | Date           | Change                                                                                                 |
|----|----------------|--------------------------------------------------------------------------------------------------------|
| 1. | March 17, 2015 | One-year post-randomization, control group participants re-assessed for eligibility and re-randomized. |
| 2. |                |                                                                                                        |
| 3. |                |                                                                                                        |
| 4. |                |                                                                                                        |
| 5. |                |                                                                                                        |

43  
44

45

## TABLE OF CONTENTS

|    |                                                                          |    |
|----|--------------------------------------------------------------------------|----|
| 46 | SCHEMA, Figure 1 .....                                                   | 2  |
| 47 | SCHEMA, Figure 2 .....                                                   | 3  |
| 48 | SUMMARY OF CHANGES – Protocol .....                                      | 4  |
| 49 | 1. OBJECTIVES .....                                                      | 6  |
| 50 | 1.1 Primary Objectives.....                                              | 6  |
| 51 | 1.2 Secondary Objectives.....                                            | 6  |
| 52 | 2. BACKGROUND .....                                                      | 6  |
| 53 | 2.1 Study Disease(s).....                                                | 6  |
| 54 | 2.2 Rationale .....                                                      | 7  |
| 55 | 3. PATIENT SELECTION .....                                               | 7  |
| 56 | 3.1 Eligibility Criteria .....                                           | 7  |
| 57 | 3.2 Exclusion Criteria .....                                             | 8  |
| 58 | 3.3 Inclusion of Women and Minorities .....                              | 8  |
| 59 | 3.4 Inclusion of Children .....                                          | 8  |
| 60 | 4. STUDY PROCEDURES .....                                                | 8  |
| 61 | 4.1 Subject Recruitment and Screening .....                              | 8  |
| 62 | 4.2 Procedures.....                                                      | 9  |
| 63 | 4.3 Early Termination .....                                              | 10 |
| 64 | 5. STATISTICAL CONSIDERATIONS.....                                       | 10 |
| 65 | 5.1 Sample Size.....                                                     | 11 |
| 66 | 5.2 Analysis Plans.....                                                  | 11 |
| 67 | 6. ADVERSE EVENTS: REPORTING REQUIREMENTS .....                          | 12 |
| 68 | 6.1 Determination of Study Risk .....                                    | 12 |
| 69 | 6.2 Reporting Adverse Events .....                                       | 13 |
| 70 | 6.3 Reporting the Intensity of an Adverse Event.....                     | 13 |
| 71 | 6.4 Reporting the Relationship of an Adverse Event to intervention ..... | 13 |
| 72 | 7. STUDY OVERSIGHT AND DATA REPORTING / REGULATORY                       |    |
| 73 | REQUIREMENTS.....                                                        | 14 |
| 74 | 7.1 Protocol Review.....                                                 | 14 |
| 75 | 7.2 Informed Consent.....                                                | 14 |
| 76 | 7.3 Changes to Protocol .....                                            | 14 |
| 77 | 7.4 Data and Safety Monitoring Plan.....                                 | 14 |
| 78 | 8. REFERENCES .....                                                      | 16 |
| 79 | APPENDIX A           NCI Common Terminology Criteria for Adverse Events  |    |
| 80 | CTC AE v3.0 18                                                           |    |

81  
82  
83  
84  
85  
86  
87  
88  
89  
90  
91  
92  
93  
94  
95  
96  
97  
98  
99  
100  
101  
102  
103  
104  
105  
106  
107  
108  
109  
110  
111  
112  
113  
114  
115  
116  
117  
118  
119  
120  
121  
122  
123  
124  
125  
126

## **1. OBJECTIVES**

### **1.1 Primary Objectives**

- 1.1.1 Histologically-diagnosed CIN 2+ within 6 months after an abnormal screening result (up to 12 months post-randomization)
- 1.1.2 Treated CIN 2+ within 6 months after diagnosed CIN 2+ (up to 18 months post-randomization)

### **1.2 Secondary Objectives**

- 1.2.1 Screening uptake within 6 months after randomization
- 1.2.2 Abnormal screening result within 6 months after randomization
- 1.2.3 Predictors of screening uptake and intervention effectiveness through administrative data
- 1.2.4 Experiences and attitudes associated with in-home HPV testing uptake (through surveys)
- 1.2.5 Experiences and attitudes associated with follow-up of positive in-home HPV testing results (through semi-structured interviews)

## **2. BACKGROUND**

### **2.1 Study Disease(s)**

Despite large-scale efforts to encourage routine Papanicolaou (Pap) screening for cervical cancer prevention, 20%-30% of U.S. women  $\geq 30$  years of age have not been screened in the past 3 years.<sup>3,4</sup> More than half of all cervical cancers in the U.S. are diagnosed in these unscreened or underscreened women.<sup>5-7</sup> 2012 national guidelines identify increasing screening coverage as the #1 research priority for reducing cervical cancer-related morbidity and mortality.<sup>1</sup> Innovative strategies that eliminate the need for clinic-based primary screening could effectively improve screening compliance while maintaining high-quality care.

Studies have demonstrated improved sensitivity and cost effectiveness for detecting pre-cancerous cervical neoplasia grade 2 to 3, carcinoma in situ, and invasive cervical cancer (hereafter referred to as CIN 2,3+) from Pap co-testing with FDA-approved tests for high-risk (hr) HPV infection compared to Pap screening alone for women  $\geq 30$  years of age.<sup>8,9</sup> While this approach is endorsed by all major U.S. guidelines as a preferred or acceptable screening strategy<sup>1,10</sup> and has advantages over traditional Pap screening, co-testing is no more likely to attract women who delay attending clinic-based screening. There is growing interest in an alternative primary screening strategy – hrHPV screening followed by triage of women with hrHPV+ test results to cytology, with studies suggesting that such a strategy could be cost-

127 effective and sensitive for detecting CIN 2,3+.<sup>11,12</sup> If samples for hrHPV screening could be self-  
128 collected at home (with in-clinic follow-up of hrHPV-positive women), the need for in-clinic  
129 screening could be eliminated for a majority of women.

130

## 131 **2.2 Rationale**

132

133 Despite the availability of highly effective prophylactic hrHPV vaccines, screening remains a  
134 necessary priority for cervical cancer prevention.<sup>1,10</sup> Current vaccines do not protect against all  
135 hrHPV types, nor do they protect women already infected with vaccine-types from developing  
136 cervical neoplasia.<sup>13</sup> Furthermore, because these vaccines have only been available since 2006,  
137 are only recommended for women  $\leq 26$  years of age,<sup>14</sup> and have not been widely used even  
138 among the recommended target population,<sup>15</sup> the majority of women  $\geq 30$  years of age (the age  
139 group at highest risk for cervical cancer) are unvaccinated. Although Pap screening programs  
140 have been highly effective in reducing cervical cancer rates over the past 50 years, a significant  
141 portion of U.S. women do not participate in regular Pap screening; 20%-30% of U.S. women  
142  $\geq 30$  years of age have not been screened in the past three years.<sup>3,4</sup> These are the women at  
143 highest risk for cervical cancer, as over half of the 12,000 cervical cancers diagnosed in the U.S.  
144 each year<sup>16</sup> are in women who have not been screened in the past three years.<sup>5-7</sup> Reaching  
145 underscreened women is a top national priority for reducing disparities in cervical cancer  
146 prevention; in fact, the 2012 joint cervical cancer screening guidelines state that the #1 research  
147 priority is to increase screening coverage.<sup>1</sup> There is a significant need for targeted, innovative  
148 interventions that increase screening participation and adherence to recommended screening  
149 intervals, while maintaining high quality care. The joint guidelines advocate for novel programs  
150 incorporating self-sampling for hrHPV testing, and evaluation of the “scale-up, implementation,  
151 and acceptability of such programs<sup>17</sup>” targeting underscreened women.<sup>1</sup> Our proposed RCT is  
152 directly responsive to this national recommendation, and will provide definitive evidence-based  
153 data on the ability of an in-home programmatic HPV screening outreach strategy to enhance  
154 early detection of cervical neoplasia and improve screening compliance. It is likely that this  
155 innovative study could change the ways in which women participate in cervical cancer screening  
156 programs. Furthermore, we will investigate patient experiences and attitudes that are associated  
157 with in-home HPV screening uptake and complete follow up of hrHPV+ test results. The latter is  
158 particularly important for understanding adherence to the continuum of cervical cancer  
159 prevention, from screening through treatment. While the majority of cervical cancers are  
160 attributable to lack of screening, up to 13% of cervical cancers diagnosed in fully-insured women  
161 are attributable to delayed follow up of abnormal Pap results.<sup>7,18,19</sup>

162

163

## 164 **3. PATIENT SELECTION**

165

### 166 **3.1 Eligibility Criteria**

167

168 3.1.1 Female sex

169

170 3.1.2 30 years to 64 years of age

171

- 172 3.1.3 Have a primary care provider at Kaiser Permanente Washington
- 173
- 174 3.1.4 Received annual "birthday letter" with Pap screening reminder 5 months earlier
- 175
- 176 3.1.5 No Pap test in the past 3.4 years
- 177
- 178 3.1.6 Continuously enrolled at Kaiser Permanente Washington for at least 3.4 years
- 179
- 180 3.1.7 No hysterectomy
- 181

## 182 **3.2 Exclusion Criteria**

- 183
- 184 3.2.1 Currently pregnant
- 185
- 186 3.2.2 Language interpreter needed
- 187
- 188 3.2.3 On "do not contact list" for research studies
- 189

## 190 **3.3 Inclusion of Women and Minorities**

191

192 The scientific objective of the proposed research is to study the ability of an in-home  
193 programmatic HPV screening outreach strategy to enhance early detection of cervical neoplasia  
194 and improve screening compliance. Because cervical cancer only affects women, our entire study  
195 population will be composed of women.

196

197 Race and ethnicity are not eligibility requirements for participation in our study. We will include  
198 all minorities that are Kaiser Permanente Washington members and meet our study eligibility  
199 requirements. The ethnic/racial composition of our study population will therefore largely reflect  
200 the ethnic/racial composition of Kaiser Permanente Washington women members. The projected  
201 proportions of participants from different ethnic/racial backgrounds are based on the composition  
202 of Kaiser Permanente Washington members (See Planned Enrollment Report table in Section  
203 5.1).

## 204

## 205 **3.4 Inclusion of Children**

206

207 We are not enrolling women younger than age 21 in the current study. All current guideline  
208 recommendations (2012) are that cervical cancer screening should begin at age 21 years  
209 (regardless of sexual history). Screening before age 21 should be avoided because women less  
210 than 21 years old are at very low risk of cancer. Screening these women may lead to  
211 unnecessary and harmful evaluation and treatment.

## 212

## 213

## 214 **4. STUDY PROCEDURES**

### 215

### 216 **4.1 Subject Recruitment and Screening**

217



218 4.1.1 Primary objectives, and secondary objectives one (1.2.1), two (1.2.2), and three (1.2.3)

219  
220 Eligible women will be identified using electronic medical record (EMR) data; all eligible  
221 women will be enrolled under a waiver of consent. The study programmer will use SAS software  
222 built in simple random sample procedure to randomly allocate participants 1:1 to the intervention  
223 arm or the control arm over a 2.5 year recruitment period. One-year post-randomization, control  
224 arm participants will be re-assessed for eligibility and re-randomized.

225  
226 Women in the control arm will receive usual care reminders to attend Pap screening. Women  
227 randomized to the usual care arm will not receive any study-related interventions or contact from  
228 the study team.

229  
230 Women in the intervention group will receive usual care plus a mailed HPV self-sampling kit  
231 with a pre-paid envelope addressed to Kaiser Permanente Washington to return the kit to the  
232 central clinical laboratory. The mailing will include an invitation letter, research information  
233 sheet, and materials for self-collecting and returning a sample. Because home HPV self-  
234 screening is not standard of care in the US, the invitation letter will advise women to receive  
235 routine Pap tests, regardless of whether they select to complete HPV self-sampling. Women will  
236 be informed participation is voluntary and provided with a telephone number to call with  
237 questions or to “opt-out” of having their individual-level medical record data used for research.  
238 To mirror Kaiser Permanente Washington prevention outreach protocols, if the kit is not returned  
239 within three weeks, study staff will make up to three reminder calls.

240  
241 4.1.2 Secondary objective four (1.2.4), survey

242  
243 We will mail survey invitation letters to intervention arm participants six months after trial  
244 randomization. We will sample two groups based on kit return status, using EMR data to identify  
245 and recruit “kit returners” and “non-returners”. Invitation letters will ask women to complete a 5-  
246 10 minute web survey about their experience with a “health screening kit” mailed 6 months  
247 prior.

248  
249 4.1.3 Secondary objective five (1.2.5), interview

250  
251 Potential interview participants will be identified 1 to 2 weeks after completing all recommended  
252 diagnostic follow-up or treatment, or after they are no longer being assessed for main trial  
253 outcomes if recommended follow-up was not completed. An invitation letter and information  
254 sheet will be mailed with a telephone number to opt-out. If the potential participant does not opt-  
255 out, an interviewer will call a few days later to conduct a 15–20 minute interview.

## 256 257 **4.2 Procedures**

258  
259 4.2.1 Medical records history

260  
261 We will obtain the following from subject medical records: (1) cervical cancer screening,  
262 diagnosis, and treatment, (2) medical information related to cervical cancer risk factors, and (3)  
263 demographic information. For example, doctor visits and lab tests, age, ethnic background and

264 other demographics, tobacco use, diagnoses, and disease history.

265

#### 266 4.2.2 Clinical outcomes

267

268 We will obtain cervical cancer screening, diagnosis, and treatment results from subject medical  
269 records up to 18 months post-randomization.

270

#### 271 4.2.3 Self-collect vaginal specimen for HPV testing

272

273 Subjects randomized to the intervention arm (in-home screening) will be asked to wash their  
274 hands and then push a polyester swab into their vagina as far as they can with no pain. Rotate  
275 three times and take the swab out. Put the swab in a specimen cup. Repeat the sample collection  
276 on a second swab. Place the specimen in a return mailer and mail the sample to the Kaiser  
277 Permanente Washington central laboratory.

278

#### 279 4.2.4 Survey

280

281 Subjects will be asked questions about their attitudes and knowledge of the self-sampling kit  
282 previously mailed to them, and preference for at-home screening compared vs. clinic-based  
283 screening, and their knowledge of cervical cancer and cervical cancer screening.

284

#### 285 4.2.5 Interview

286

287 Subjects will be asked about their experience and thoughts about the self-sampling kit previously  
288 mailed to them, Pap testing, their test preferences, their knowledge of cervical cancer and  
289 cervical cancer screening, and their contacts with their doctor or health care team.

290

### 291 **4.3 Early Termination**

292

293 Any subjects experiencing a serious adverse event felt to be related to study procedures should  
294 be withdrawn from the study. Any subject withdrawing their consent to participate in the study  
295 or their authorization to use their protected health information will be withdrawn from the study.

296

297 All subjects randomized into the study will be included in the final study analyses. Subjects may  
298 be withdrawn from the study if:

299

- 300 1) Voluntary patient withdrawal;

301

302 Reasons why subjects are discontinued from the clinical trial will be documented on the study  
303 termination tracking log.

304

305

## 306 **5. STATISTICAL CONSIDERATIONS**

307

308 **5.1 Sample Size**

309

310 **PLANNED ENROLLMENT REPORT**

| <b>ANTICIPATED/PLANNED ENROLLMENT for ENTIRE STUDY:<br/>Number of Participants (must provide exact numbers. i.e. no range)</b> |                   |       |        |
|--------------------------------------------------------------------------------------------------------------------------------|-------------------|-------|--------|
| <b>Ethnic Categories</b>                                                                                                       | <b>Sex/Gender</b> |       |        |
|                                                                                                                                | Females           | Males | Total  |
| Hispanic or Latino                                                                                                             | 880               | 0     | 880    |
| Not Hispanic or Latino                                                                                                         | 16,711            | 0     | 16,711 |
| <b>Ethnic Categories: Total of All Participants</b>                                                                            | 17,591            | 0     | 17,591 |
| <b>Racial Categories</b>                                                                                                       |                   |       |        |
| American Indian/Alaska Native                                                                                                  | 705               | 0     | 705    |
| Asian                                                                                                                          | 1,406             | 0     | 1,406  |
| Native Hawaiian or Other Pacific Islander                                                                                      | 176               | 0     | 176    |
| Black or African American                                                                                                      | 880               | 0     | 880    |
| White                                                                                                                          | 14,424            | 0     | 14,424 |
| <b>Racial Categories: Total of All Participants</b>                                                                            | 17,591            | 0     | 17,591 |

311

312 Estimated based on the number and racial and ethnic distribution of underscreened women in  
313 2011 in Kaiser Permanente Washington

314

315 **5.2 Analysis Plans**

316

317 5.2.1 Analysis plan relevant to primary objectives and secondary objectives one (1.2.1), two  
318 (1.2.2), and three (1.2.3)

319

320 Data will be analyzed based on the intention-to-treat principle. Denominators for each arm will  
321 generally include all women randomized to that arm, minus the women identified post-  
322 randomization as ineligible. For diagnosed and treated CIN 2+, abnormal screening results, and  
323 screening uptake, we will compare the proportion of outcomes detected in the intervention arm  
324 to the proportion detected in the usual care arm and estimate relative risks using log-binomial  
325 regression. Robust variances estimates will be used to account for within-subject correlation due  
326 to re-randomized subjects contributing more than one observation period. If differences are  
327 observed in the distribution of EMR-derived subject characteristics across arms despite  
328 randomization, we will adjust for the relevant covariates in the regression models. Subject  
329 characteristics of interest include age, race, ethnicity, length of health plan enrollment before  
330 randomization, etc.

331

332 To evaluate predictors of screening uptake, we will use log-binomial regression to estimate the  
333 effects of subject characteristics on the probability of screening uptake. To test for effect  
334 modification by randomization arm (i.e., to test if home HPV screening is more effective at  
335 increasing uptake than usual care for subgroups of women), we will test characteristic-by-  
336 randomization arm interaction terms using log-binomial regression comparing the relative risk of  
337 screening uptake in the intervention arm relative to the usual care arm by characteristics of

338 interest.

339

340 In an exploratory analysis, positive predictive value (PPV) of an abnormal screening test for  
341 detecting CIN 2+ will be estimated within each arm. The denominator will include women who  
342 receive an abnormal screening result within 6 months of randomization that warrants referral to  
343 colposcopy, and the numerator will include women with diagnosed CIN 2+. We will also  
344 calculate PPV restricting the denominator to women who receive colposcopy within 6 months of  
345 the abnormal screening result.

346

347 5.2.2 Analysis plans relevant to secondary objectives four (1.2.4) and five (1.2.5)

348

349 Through surveys and in-depth interviews of women in the in-home HPV screening arm, we will  
350 identify patient experiences and attitudes that are associated with in-home HPV testing uptake  
351 and complete follow up of hrHPV+ test results. We will describe frequency distributions of  
352 responses to survey questions about patient experiences and attitudes (aligned with our  
353 conceptual model—adapted from Andersen-Aday<sup>20-22</sup> & Proctor<sup>23</sup>). We will transcribe, code and  
354 analyze the semi-structured interviews to examine experiences and attitudes related to timely  
355 completion of follow up of hrHPV+ results. Together with the system-level impact data, these  
356 results will provide important information about how multi-level systems can support timely  
357 follow up for hrHPV+ women, and areas for additional educational intervention.

358

## 359 **6. ADVERSE EVENTS: REPORTING REQUIREMENTS**

360

### 361 **6.1 Determination of Study Risk**

362

363 This is a minimal risk study where the medical intervention has similar potential adverse events  
364 as women undergoing standard clinical procedures such as Pap, human papillomavirus (HPV) or  
365 other sexually transmitted disease testing. Based on our own previous and ongoing studies and  
366 numerous other prior studies involving self-collected vaginal swabs, we expect adverse events  
367 will be rare and minor in severity. The study questionnaires and interviews also present minimal  
368 risk to subjects as they do not address highly sensitive information. As such, the principal  
369 investigator will continuously monitor adverse events as they are reported to the study hotline  
370 and also through women's primary care teams. Both reviewing institutional review boards for  
371 this study (University of Washington and Kaiser Permanente Washington) have ruled in  
372 agreement with this assessment.

373

374 Discomfort and light bleeding are the expected adverse events (AEs). In our previous University  
375 of Washington studies of in-home HPV testing, light bleeding was reported by a small minority  
376 of subjects who used in-home HPV test kits (less frequent than bleeding from standard Pap  
377 testing). We have no plan for stopping rules due to bleeding because we are only capturing AEs  
378 through self-report to the study hotline or primary care teams, and do not expect that the number  
379 of reports of bleeding would exceed the frequency of bleeding from standard Pap testing. All  
380 adverse events will be continuously monitored by the Principal Investigator.

381

382 Toxicities and adverse events will be assessed using the NCI Common Toxicity Criteria for  
383 Adverse Events v3.0 (CTCAE; see Appendix A).

384  
385  
386  
387  
388  
389  
390  
391  
392  
393  
394  
395  
396  
397  
398  
399  
400  
401  
402  
403  
404  
405  
406  
407  
408  
409  
410  
411  
412  
413  
414  
415  
416  
417  
418  
419  
420  
421  
422

## 6.2 Reporting Adverse Events

All adverse events, whether solicited or spontaneous, must be documented in the adverse event (AE) case report form (CRF).

Adverse events will be reported by patients via the study telephone hotline, or via report to their Kaiser Permanente provider (providers will report AEs to study staff). All AEs reported to study staff, regardless of causality, must be recorded immediately in the AE CRF.

The Principal Investigator will designate a medical monitor that will be responsible for following AEs that are serious or that cause the patient to discontinue before completing the study, through an appropriate health care option. The patient should be followed until the event resolves or stabilizes. Frequency of follow-up is at the discretion of the medical monitor. The medical monitor must follow the clinical course of each AE until resolution or stabilization. Serious AEs ongoing at the end of the study period must be followed up to final outcome.

## 6.3 Reporting the Intensity of an Adverse Event

The intensity of an AE will be described and graded per NCI Common Terminology Criteria for Adverse Events CTC AE v3.0 ([http://ctep.cancer.gov/protocolDevelopment/electronic\\_applications/docs/ctcaev3.pdf](http://ctep.cancer.gov/protocolDevelopment/electronic_applications/docs/ctcaev3.pdf)).

## 6.4 Reporting the Relationship of an Adverse Event to intervention

The medical monitor will determine the assessment of the causal relationship of the event to study intervention using the following guidelines:

- **Attribution** of the AE:
  - Definite – The AE *is clearly related* to the study treatment.
  - Probable – The AE *is likely related* to the study treatment.
  - Possible – The AE *may be related* to the study treatment.
  - Unlikely – The AE *is doubtfully related* to the study treatment.
  - Unrelated – The AE *is clearly NOT related* to the study treatment.

All adverse events, regardless of severity, will be classified as expected or unexpected and reported to the Kaiser Permanente Washington Human Subjects Review Committee, per current Kaiser Permanente Washington Human Subjects Review Committee Incident Guidelines.

423  
424  
425  
426  
427  
428  
429  
430  
431  
432  
433  
434  
435  
436  
437  
438  
439  
440  
441  
442  
443  
444  
445  
446  
447  
448  
449  
450  
451  
452  
453  
454  
455  
456  
457  
458  
459  
460  
461  
462  
463  
464  
465  
466  
467  
468

## **7. STUDY OVERSIGHT AND DATA REPORTING / REGULATORY REQUIREMENTS**

### **7.1 Protocol Review**

The protocol and informed consent forms for this study must be reviewed and approved in writing by a properly constituted independent Ethics Committee (EC) or Institutional Review Board (IRB) prior to any patient being registered on this study.

### **7.2 Informed Consent**

#### **7.2.1 Primary objective and secondary objectives one (1.2.1), two (1.2.2), and three (1.2.3)**

All consent conduct in compliance with Code of Federal Regulations, Title 45, Part 46 (45 CFR part 46). To reduce participation bias, all eligible women will be enrolled into the trial under a waiver of consent. Informed consent of intervention arm kit recipients will be per a waiver of documentation of consent. Intervention arm women will have the ability to opt-out of having their individual-level medical record data used in the research, but passive consent will be utilized which will significantly enhance the generalizability of the findings.

#### **7.2.2 Secondary objectives four (1.2.4) and five (1.2.5) (surveys and in-depth interviews of women in the in-home HPV screening arm)**

In compliance with 45 CFR part 46, informed consent will be obtained from all women via a waiver of documentation of consent.

### **7.3 Changes to Protocol**

Any modification of this protocol must be approved by the Principal Investigator and approved by the IRB(s), before the revision or amendment may be implemented. The only circumstance in which the amendment may be initiated without regulatory approval is for a change necessary to eliminate an apparent and immediate hazard to the patient. In that event, the investigator must notify the IRB in writing per current IRB rules.

### **7.4 Data and Safety Monitoring Plan**

An interim data look at the kit return rate in the intervention arm will be reviewed by limited study staff 6 weeks after reaching 50% of the expected target accrual; a kit return rate of >10% is set as the threshold for continuing the trial because a lower return rate will make the intervention not clinically viable.

Study staff involved in interim data activities will not be involved in any scientific decisions about modifications to the study protocol, but may consult with an external scientific advisory committee if review of study data raises any potential ethical concerns. Membership on the

469 external scientific committee will include a Kaiser Permanente Washington Health Research  
470 Institute biostatistician and a University of Washington clinician. The scientific leadership  
471 committee, comprised of the Principal Investigator, project PhD biostatistician, and one  
472 additional co-investigator, will be blinded to all primary and secondary outcomes analyses until 6  
473 months after the last subject is enrolled.

474

475

476

477 **8. REFERENCES**  
478

- 479 1. Saslow D, Solomon D, Lawson HW, et al. American Cancer Society, American Society for  
480 Colposcopy and Cervical Pathology, and American Society for Clinical Pathology  
481 screening guidelines for the prevention and early detection of cervical cancer. *CA Cancer J*  
482 *Clin.* 2012;62(3):147-172. doi:10.3322/caac.21139
- 483 2. Massad LS, Einstein MH, Huh WK, et al. 2012 updated consensus guidelines for the  
484 management of abnormal cervical cancer screening tests and cancer precursors. *Obstet*  
485 *Gynecol.* 2013;121(4):829-846. doi:10.1097/AOG.0b013e3182883a34
- 486 3. *Health US, 2009: With Special Feature on Medical Technology.* Hyattsville, MD: National  
487 Center for Health Statistics; 2010.
- 488 4. *The State of Healthcare Quality 2010.* The National Committee for Quality Assurance;  
489 2010.
- 490 5. Kinney W, Sung HY, Kearney KA, Miller M, Sawaya G, Hiatt RA. Missed opportunities  
491 for cervical cancer screening of HMO members developing invasive cervical cancer (ICC).  
492 *Gynecol Oncol.* 1998;71(3):428-430. doi:10.1006/gyno.1998.5135
- 493 6. Janerich DT, Hadjimichael O, Schwartz PE, et al. The screening histories of women with  
494 invasive cervical cancer, Connecticut. *Am J Public Health.* 1995;85(6):791-794.  
495 doi:10.2105/ajph.85.6.791
- 496 7. Leyden WA, Manos MM, Geiger AM, et al. Cervical cancer in women with comprehensive  
497 health care access: attributable factors in the screening process. *J Natl Cancer Inst.*  
498 2005;97(9):675-683. doi:10.1093/jnci/dji115
- 499 8. Goldie SJ, Kim JJ, Wright TC. Cost-effectiveness of human papillomavirus DNA testing  
500 for cervical cancer screening in women aged 30 years or more. *Obstet Gynecol.*  
501 2004;103(4):619-631. doi:10.1097/01.AOG.0000120143.50098.c7
- 502 9. Wright TC, Schiffman M, Solomon D, et al. Interim guidance for the use of human  
503 papillomavirus DNA testing as an adjunct to cervical cytology for screening. *Obstet*  
504 *Gynecol.* 2004;103(2):304-309. doi:10.1097/01.AOG.0000109426.82624.f8
- 505 10. Moyer VA, U. S. Preventive Services Task Force. Screening for cervical cancer: U.S.  
506 Preventive Services Task Force recommendation statement. *Ann Intern Med.*  
507 2012;156(12):880-891, W312. doi:10.7326/0003-4819-156-12-201206190-00424
- 508 11. Balasubramanian A, Kulasingam SL, Baer A, et al. Accuracy and cost-effectiveness of  
509 cervical cancer screening by high-risk human papillomavirus DNA testing of self-collected  
510 vaginal samples. *J Low Genit Tract Dis.* 2010;14(3):185-195.  
511 doi:10.1097/LGT.0b013e3181cd6d36
- 512 12. Cuzick J, Arbyn M, Sankaranarayanan R, et al. Overview of human papillomavirus-based  
513 and other novel options for cervical cancer screening in developed and developing



- 514 countries. *Vaccine*. 2008;26 Suppl 10:K29-41. doi:10.1016/j.vaccine.2008.06.019
- 515 13. Markowitz LE. HPV vaccines prophylactic, not therapeutic. *JAMA*. 2007;298(7):805-806.  
516 doi:10.1001/jama.298.7.805
- 517 14. Markowitz LE, Dunne EF, Saraiya M, et al. Quadrivalent Human Papillomavirus Vaccine:  
518 Recommendations of the Advisory Committee on Immunization Practices (ACIP). *MMWR*  
519 *Recomm Rep Morb Mortal Wkly Rep Recomm Rep*. 2007;56(RR-2):1-24.
- 520 15. Advisory Committee on Immunization Practices. Recommended adult immunization  
521 schedule: United States, 2012. *Ann Intern Med*. 2012;156(3):211-217. doi:10.7326/0003-  
522 4819-156-3-201202070-00388
- 523 16. U.S. Cancer Statistics Working Group. *United States Cancer Statistics: 1999–2007*  
524 *Incidence and Mortality Web-Based Report*. Atlanta, GA: Department of Health and  
525 Human Services <http://www.cdc.gov/uscs>.
- 526 17. World Health Organization, Department of Reproductive Health and Research. *Practical*  
527 *Guidance for Scaling Up Health Service Innovations*. Geneva, Switzerland: World Health  
528 Organization; 2009.
- 529 18. Stuart GC, McGregor SE, Duggan MA, Nation JG. Review of the screening history of  
530 Alberta women with invasive cervical cancer. *CMAJ Can Med Assoc J J Assoc Medicale*  
531 *Can*. 1997;157(5):513-519.
- 532 19. Sung HY, Kearney KA, Miller M, Kinney W, Sawaya GF, Hiatt RA. Papanicolaou smear  
533 history and diagnosis of invasive cervical carcinoma among members of a large prepaid  
534 health plan. *Cancer*. 2000;88(10):2283-2289.
- 535 20. Aday LA, Andersen R. A framework for the study of access to medical care. *Health Serv*  
536 *Res*. 1974;9(3):208-220.
- 537 21. Andersen RM. Revisiting the behavioral model and access to medical care: does it matter?  
538 *J Health Soc Behav*. 1995;36(1):1-10.
- 539 22. Yabroff KR. Interventions to improve cancer screening: commentary from a health services  
540 research perspective. *Am J Prev Med*. 2008;35(1 Suppl):S6-9.  
541 doi:10.1016/j.amepre.2008.04.006
- 542 23. Proctor E, Silmere H, Raghavan R, et al. Outcomes for implementation research:  
543 conceptual distinctions, measurement challenges, and research agenda. *Adm Policy Ment*  
544 *Health*. 2011;38(2):65-76. doi:10.1007/s10488-010-0319-7

545  
546

547 **APPENDIX A            NCI COMMON TERMINOLOGY CRITERIA FOR ADVERSE**  
548 **EVENTS CTC AE V3.0**

549  
550 Adverse events will be assessed using the NCI Common Toxicity Criteria for Adverse Events  
551 v3.0 (CTCAE). A copy can be downloaded from the CTEP home page.

552  
553 [http://ctep.cancer.gov/protocolDevelopment/electronic\\_applications/ctc.htm](http://ctep.cancer.gov/protocolDevelopment/electronic_applications/ctc.htm)

554  
555
