# Supplementary material for: Effect of Mailed Human Papillomavirus Test Kits vs Usual Care Reminders on Cervical Cancer Screening Uptake, Precancer Detection, and Treatment: A Randomized Clinical Trial
Source: PubMed Central journal article supplement (PMC6865279; doi:10.1001/jamanetworkopen.2019.14729), 2019-11-06
Supplement: jamanetwopen-2-e1914729-s002.pdf [file jamanetwopen-2-e1914729-s002.pdf]

## Supplementary Online Content

Winer RL, Lin J, Tiro JA, et al. Effect of mailed human papillomavirus test kits vs usual care reminders on cervical cancer screening uptake, precancer detection, and treatment: a randomized clinical trial. *JAMA Netw Open*. 2019;2(11):e1914729. doi:10.1001/jamanetworkopen.2019.14729

**eFigure.** Detailed Diagram of Cervical Cancer Screening Uptake and HPV Kit Results Within the Intervention Group

This supplementary material has been provided by the authors to give readers additional information about their work.

**eFigure. Detailed Diagram of Cervical Cancer Screening Uptake and HPV Kit Results within the Intervention Group**

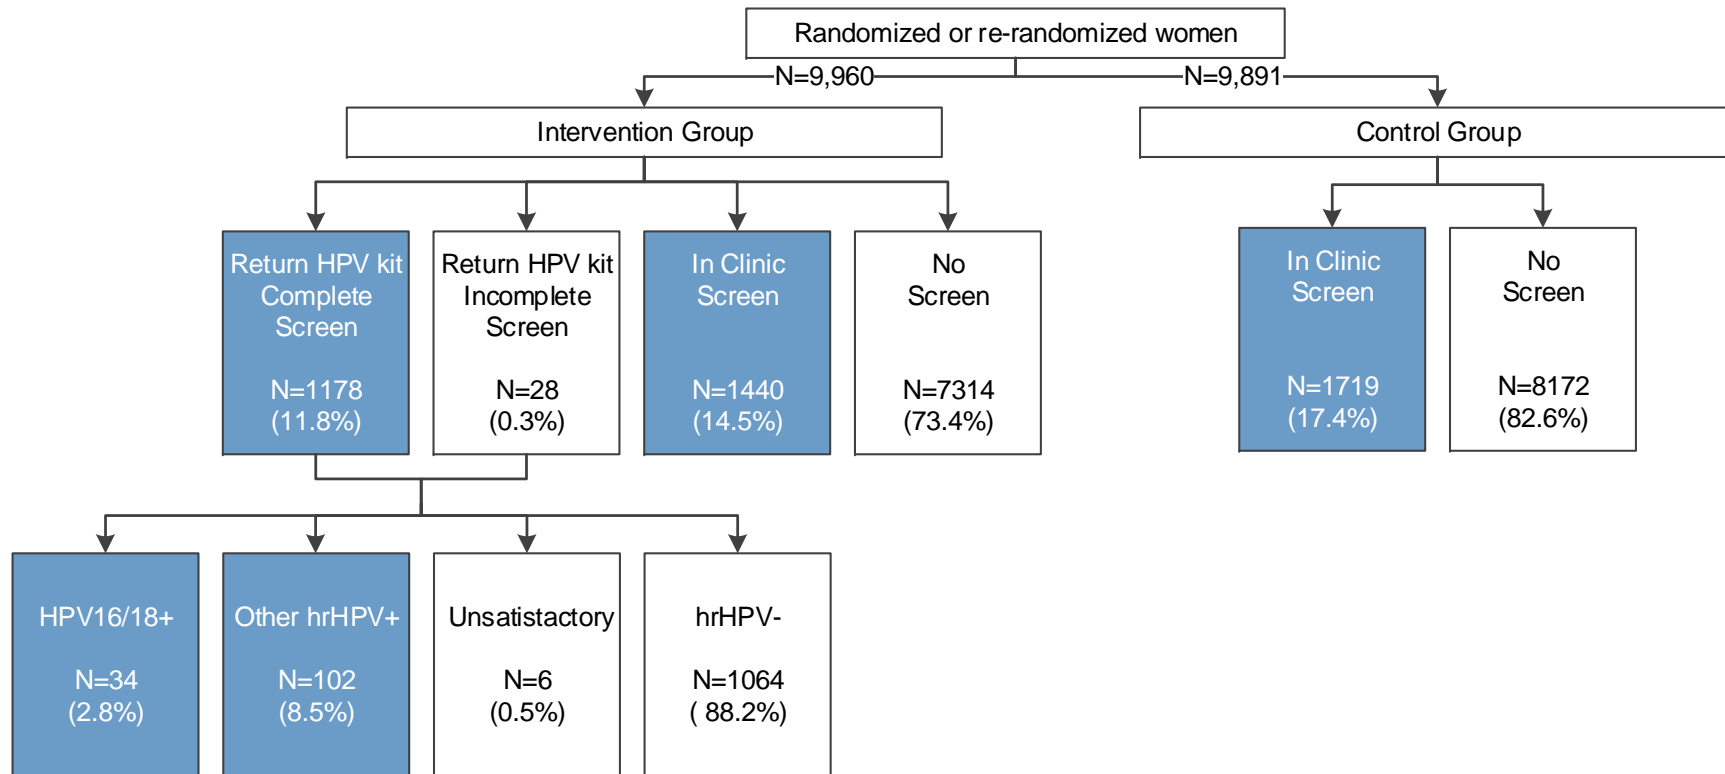

**eFigure. Footnotes**

Abbreviations: HPV, human papillomavirus; hrHPV, high risk human papillomavirus
